# Supplementary material for: Reinforcement of the Standard Therapy with Two Infusions of Convalescent Plasma for Patients with COVID-19: A Randomized Clinical Trial
Source: MDPI journal article supplement (doi:10.3390/jcm11113039), 2022-05-27
Supplement: s1 [file s1]

## Supplementary Data

### Hematimetry

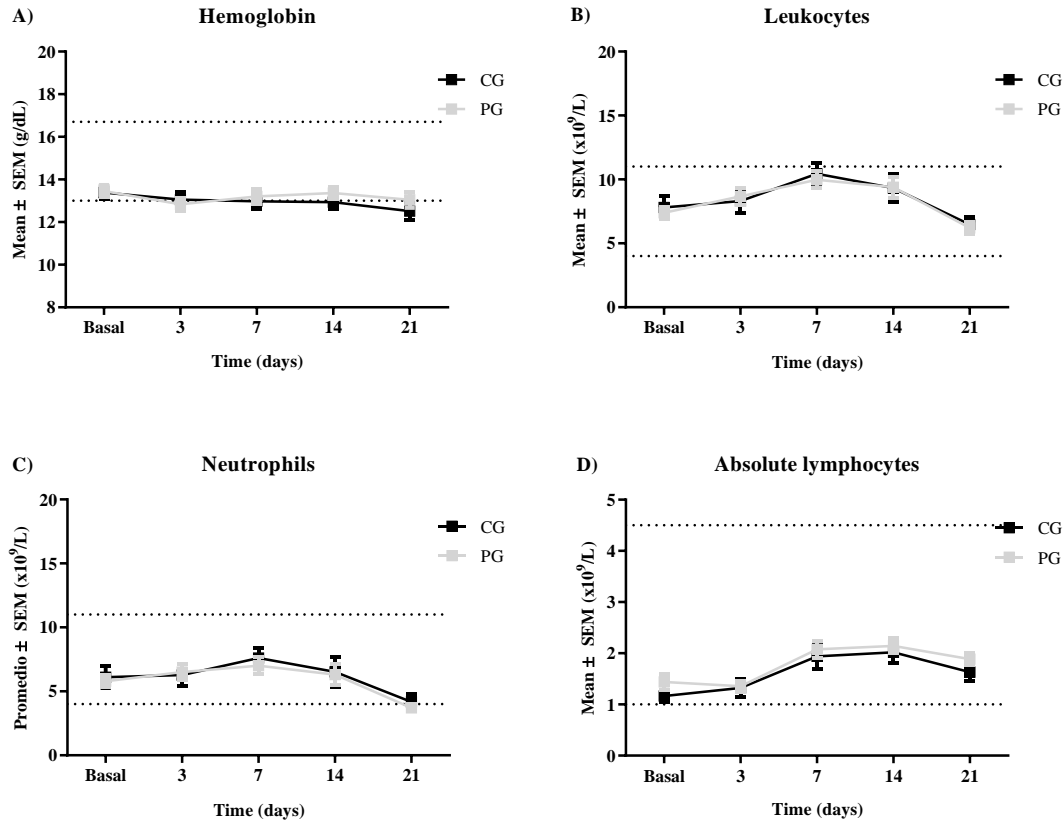

**Figure S1.** Changes in hematology parameters from baseline to the end of the follow-up period (baseline, 3, 7, 14, 21) in control group (CG) and plasma group (PG). Lines represent the mean  $\pm$  SEM of the following parameters in each previous mentioned time point: (A) haemoglobin (g/dL), (B) leukocytes ( $\times 10^9/L$ ), (C) neutrophils ( $\times 10^9/L$ ), and (D) absolute lymphocytes ( $\times 10^9/L$ ).

### Coagulation

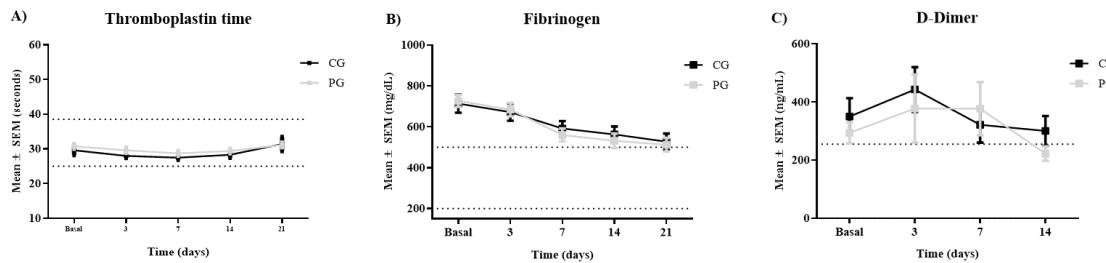

**Figure S2.** Changes in hematology parameters from baseline to the end of the follow-up period (baseline, 3, 7, 14, 21) in control group (CG) and plasma group (PG). Lines represent the mean  $\pm$  SEM of the following parameters in each previous mentioned time point: (A) thromboplastin time (seconds), (B) fibrinogen (mg/dL), and (C) D-dimer (ng/mL).

## Biochemistry

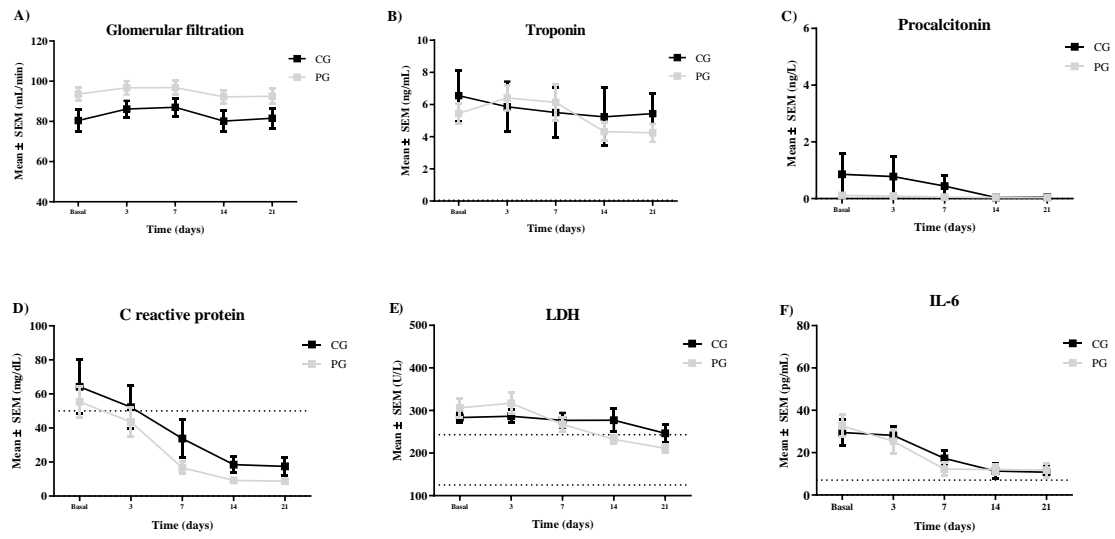

**Figure S3.** Changes in hematimetry parameters from baseline to the end of the follow-up period (baseline, 3, 7, 14, 21) in control group (CG) and plasma group (PG). Lines represent the mean  $\pm$  SEM of the following parameters in each previous mentioned time point: (A) glomerular filtration (mL/min), (B) troponin (ng/mL), (C) procalcitonin (ng/L), (D) C reactive protein (mg/dL), and (E) LDH (U/L), (F) IL-6 pg/mL).

## Immunity

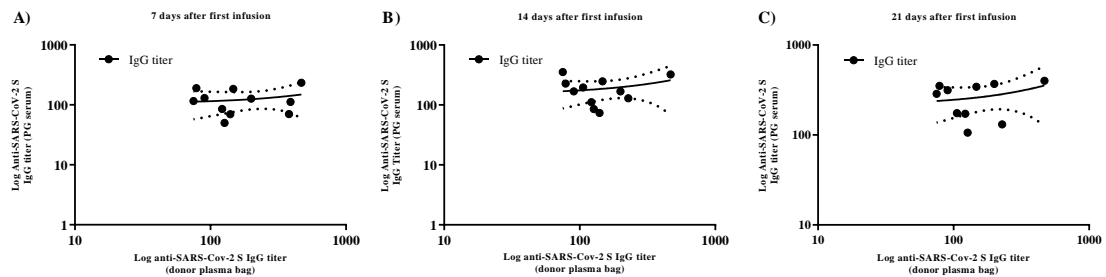

**Figure S4.** Correlation between the levels of anti-SARS-CoV-2 S IgG titers (UA/mL) in PG serum vs. donor plasma bag received at: (A) 7, (B) 14, and (C) 21 days after the last infusion. Correlation performed by Pearson test,  $p > 0.05$ ,  $r^2 < 0.05$ .

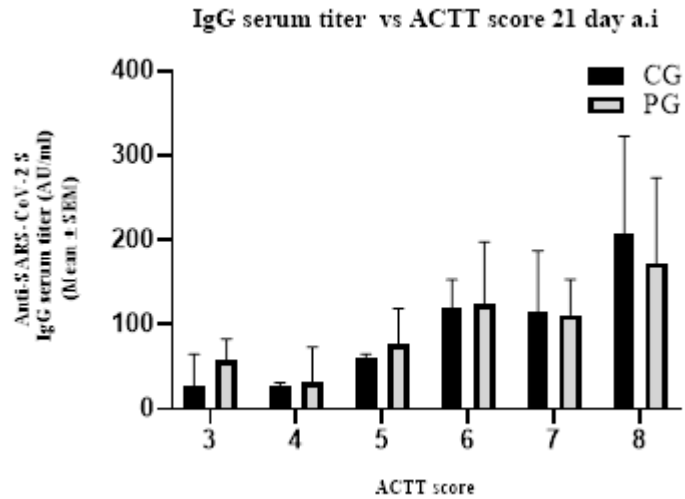

**Figure S5.** Correlation between the levels of anti-SARS-CoV-2 S IgG titers (UA/mL) in control (CG) and plasma group (PG) serum vs. ACTT score at 21 days after the first infusion (a.i). There were no statistical differences ( $F(5, 54) = 0.38, p > 0.05$ ) by two-way ANOVA followed by the Tukey post hoc test.

**Table S1.** Standard therapy used in control (CG)  $n = 17$  and plasma group (PG)  $n = 37$ . Type of medication classified by their function, specific drugs administered with distribution in frequency and percentage.  $\chi^2$  test was performed to assess statistical differences between drugs and groups.

| Type of Medication                   | Drugs                       | CG<br><i>n</i> (%) | PG<br><i>n</i> (%) | <i>p</i> -Value |
|--------------------------------------|-----------------------------|--------------------|--------------------|-----------------|
| Antiaggregant                        | heparin                     | 5 (29.41)          | 13 (35.14)         | $p > 0,05$      |
|                                      | enoxaparin                  |                    |                    |                 |
| Antibiotics                          | ceftriaxone                 | 5 (29.34)          | 17 (45.95)         | $p > 0,05$      |
|                                      | amoxiciliin-clavulanic acid |                    |                    |                 |
| Anti-inflammatory<br>immunosupressor | desametaxone                | 13 (76.47)         | 32 (86.5)          | $p > 0,05$      |
|                                      | methylprednisolone          |                    |                    |                 |
| Antivirals                           | lopinavir/ritonavir         | 6 (35.29)          | 12 (32.43)         | $p > 0,05$      |
|                                      | remdesivir                  |                    |                    |                 |
| Oxygentherapy                        |                             | 11 (64.71)         | 20 (54.05)         | $p > 0,05$      |

**Table S2.** Monitoring procedures and measures carried out during the follow-up period.

| Procedures                                      | Follow-up day   |   |   |   |   |    |    |
|-------------------------------------------------|-----------------|---|---|---|---|----|----|
|                                                 | Screening/Basal | 1 | 2 | 3 | 7 | 14 | 21 |
| Medical history review and physical exploration | x               | x | x | x | x | x  | x  |
| Signed informed consent form/randomization      | x               |   |   |   |   |    |    |
| Vital sings                                     | x               | x |   | x | x | x  | x  |
| Weight. Height. BMI                             | x               | x |   | x | x | x  | x  |
| ACTT scale                                      | x               | x |   | x | x | x  | x  |
| ABO/Rh Group                                    | x               |   |   |   |   |    |    |
| Hematrimetry                                    | x               | x |   | x | x | x  | x  |
| Coagulation                                     | x               | x |   | x | x | x  | x  |
| Biochemistry                                    | x               | x |   | x | x | x  | x  |
| Serology IgG anti-SARS-CoV-2                    | x               |   |   | x | x | x  | x  |
| RT-PCR RNA S protein SARS-CoV-2                 | x               |   |   | x | x | x  | x  |
| Advers effects                                  |                 |   |   | x | x | x  | x  |
| Concomitant Review and Clinical Response        | x               |   |   | x | x | x  | x  |

**Table S3.** Grades and meanings in the Adaptive COVID-19 Treatment Trial Scale (ACTT-Scale) version II for COVID-19 disease used in the present trial following the Remdesivir Trial and the guidelines of the National Institute of Allergy and Infectious Disease of the United States (NIAID) [15]. Scores considered as clinical improvement are marked in bold.

| Scale           | Grade | Meaning                                                                                                          |
|-----------------|-------|------------------------------------------------------------------------------------------------------------------|
| ACTT-version II | 1     | Death                                                                                                            |
|                 | 2     | Hospitalized. on invasive mechanical ventilation or extracorporeal membrane oxygenation (ECMO)                   |
|                 | 3     | Hospitalized. on non-invasive ventilation or high flow oxygen devices                                            |
|                 | 4     | Hospitalized. requiring supplemental oxygen                                                                      |
|                 | 5     | Hospitalized. not requiring supplemental oxygen - requiring ongoing medical care (COVID-19 related or otherwise) |
|                 | 6     | <b>Hospitalized. not requiring supplemental oxygen - no longer requires ongoing medical care</b>                 |
|                 | 7     | <b>Not hospitalized. limitation on activities and/or requiring home oxygen</b>                                   |
|                 | 8     | <b>Not hospitalized. no limitations on activities</b>                                                            |

**Table S4.** Comorbidities in control (CG) and plasma group (PG), with type of diseases and specific diseases, in frequency and percentage.

| Type of disease                       | Disease                         | CG ( <i>n</i> = 17) |      | PG ( <i>n</i> = 37) |      |
|---------------------------------------|---------------------------------|---------------------|------|---------------------|------|
|                                       |                                 | n                   | %    | n                   | %    |
| Cardiac diseases                      | arterial hypertension           | 11                  | 64.7 | 26                  | 70.3 |
|                                       | heart disease                   | 4                   | 23.5 | 2                   | 5.4  |
|                                       | auricular fibrillation          | 1                   | 5.9  | 4                   | 10.8 |
|                                       | TOTAL                           | 16                  | 94.1 | 32                  | 86.5 |
| Respiratory diseases                  | ASMA                            | 4                   | 23.5 | 5                   | 13.5 |
|                                       | Sleep apnea                     | 1                   | 5.9  | 2                   | 5.4  |
|                                       | EPOC                            | 1                   | 5.9  | 3                   | 8.1  |
|                                       | TOTAL                           | 6                   | 35.3 | 10                  | 27.0 |
| Digestive diseases                    | gastritis                       | 2                   | 11.8 | 2                   | 5.4  |
|                                       | gastroesophageal reflux disease | 1                   | 5.9  | 1                   | 2.7  |
|                                       | TOTAL                           | 3                   | 17.6 | 3                   | 8.1  |
| Neurological diseases                 | migraine                        | 2                   | 11.8 | 7                   | 18.9 |
|                                       | innespecific shaking            | 1                   | 5.9  | 0                   | 0.0  |
|                                       | parkinson                       | 1                   | 5.9  | 0                   | 0.0  |
|                                       | dementia                        | 1                   | 5.9  | 1                   | 2.7  |
|                                       | TOTAL                           | 5                   | 29.4 | 8                   | 21.6 |
|                                       | depression                      | 2                   | 11.8 | 1                   | 2.7  |
| Psychiatric diseases                  | anxiety                         | 3                   | 17.6 | 1                   | 2.7  |
|                                       | TOTAL                           | 5                   | 29.4 |                     | 0.0  |
| Nephrological diseases                | prostatic hyperplasia           | 2                   | 11.8 | 1                   | 2.7  |
|                                       | renal insuficiency              | 1                   | 5.9  | 7                   | 18.9 |
|                                       | TOTAL                           | 3                   | 17.6 | 8                   | 21.6 |
| Oftalmological diseases               | eye infection                   | 1                   | 5.9  | 1                   | 2.7  |
|                                       | glaucoma                        | 1                   | 5.9  | 0                   | 0.0  |
|                                       | TOTAL                           | 2                   | 11.8 | 1                   | 2.7  |
| Dermatological diseases               | psoriasis                       | 1                   | 5.9  | 1                   | 2.7  |
|                                       | TOTAL                           | 1                   | 5.9  |                     | 0.0  |
| Endocrinological diseases             | dyslipidemia                    | 6                   | 35.3 | 12                  | 32.4 |
|                                       | diabetes miellitus              | 2                   | 11.8 | 9                   | 24.3 |
|                                       | hypothyroidism                  | 1                   | 5.9  | 3                   | 8.1  |
|                                       | obesity                         | 5                   | 29.4 | 9                   | 24.3 |
|                                       | hypercholesterolemia            | 1                   | 5.9  | 3                   | 8.1  |
|                                       | TOTAL                           | 15                  | 88.2 | 36                  | 97.3 |
| Rheumatic and osteoarticular diseases | cervicoarthrosis                | 1                   | 5.9  | 0                   | 0.0  |
|                                       | ankylosing spondylitis          | 1                   | 5.9  | 1                   | 2.7  |
|                                       | spondyloarthrosis. dorsal       | 1                   | 5.9  | 1                   | 2.7  |
|                                       | hyperostosis                    |                     |      |                     |      |
|                                       | osteoarthritis                  | 1                   | 5.9  | 1                   | 2.7  |
|                                       | arthritis                       | 1                   | 5.9  | 2                   | 5.4  |
|                                       | TOTAL                           | 5                   | 29.4 | 5                   | 13.5 |
| Immunitary diseases                   | Sjögren syndrome                | 1                   | 5.9  | 0                   | 0.0  |
|                                       | TOTAL                           | 1                   | 5.9  | 0                   | 0.0  |
